# Supplementary material
Source: publisher figshare collection journal article supplement (https://gsajournals.figshare.com/articles/dataset/_/7936622)
Supplement: Supplementary file 1 [file 1]

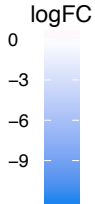

| Sym-Heat /<br>Sym-Norm | Apo-Heat /<br>Apo-Norm | Apo-Heat /<br>Sym-Norm | Apo-Norm /<br>Sym-Norm |       |              |
|------------------------|------------------------|------------------------|------------------------|-------|--------------|
| -0.65                  | -1.08                  | -2.23                  | -1.17                  | NPC2A | AIPGENE3167  |
| -0.83                  | 0.39                   | -2.61                  | -3.01                  | NPC2F | AIPGENE3074  |
| -1.61                  | -0.03                  | -10.88                 | -10.87                 | NPC2B | AIPGENE22527 |
| -1.23                  | -1.20                  | -11.97                 | -10.79                 | NPC2D | AIPGENE22473 |
| -0.73                  | -0.85                  | -4.92                  | -4.09                  | NPC2C | AIPGENE22539 |
| -1.13                  | -0.44                  | -2.03                  | -1.61                  | NPC2E | AIPGENE20032 |
