# Supplementary material
Source: publisher figshare collection journal article supplement (https://gsajournals.figshare.com/articles/dataset/_/7936622)
Supplement: Supplementary file 3 [file 1]

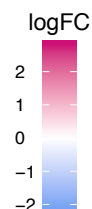

| Sym-Heat /<br>Sym-Norm | Apo-Heat /<br>Apo-Norm | Apo-Heat /<br>Sym-Norm | Apo-Norm /<br>Sym-Norm |       |              |                                         |
|------------------------|------------------------|------------------------|------------------------|-------|--------------|-----------------------------------------|
| 0.60                   | 0.46                   | 0.96                   | 0.48                   | GORAB | AIPGENE2803  | RAB6-interacting golgin                 |
| -0.15                  | 0.48                   | -0.41                  | -0.91                  | RAB13 | AIPGENE12806 | Ras-related protein Rab-13              |
| -0.34                  | 0.33                   | -1.04                  | -1.38                  | RAB13 | AIPGENE12823 | Ras-related protein Rab-13              |
| 0.49                   | 0.17                   | 0.07                   | -0.11                  | RAB13 | AIPGENE18849 | Ras-related protein Rab-13              |
| 0.17                   | -0.14                  | -0.59                  | -0.46                  | RAB13 | AIPGENE19750 | Ras-related protein Rab-13              |
| 0.21                   | 0.32                   | -0.06                  | -0.40                  | RAB14 | AIPGENE18421 | Ras-related protein Rab-14              |
| -0.32                  | 0.60                   | -0.81                  | -1.42                  | RAB18 | AIPGENE11215 | Ras-related protein Rab-18              |
| 0.21                   | 0.24                   | -0.23                  | -0.49                  | RAB1A | AIPGENE2448  | Ras-related protein Rab-1A              |
| 0.48                   | 0.17                   | 0.43                   | 0.25                   | RAB1B | AIPGENE16067 | Ras-related protein Rab-1B              |
| 0.24                   | 0.28                   | -0.18                  | -0.47                  | RAB2  | AIPGENE3537  | Ras-related protein Rab-2               |
| -0.09                  | 0.01                   | -0.63                  | -0.66                  | RAB20 | AIPGENE8885  | Ras-related protein Rab-20              |
| -0.13                  | 0.27                   | -0.48                  | -0.77                  | RAB21 | AIPGENE11177 | Ras-related protein Rab-21              |
| 0.00                   | 0.32                   | -0.22                  | -0.55                  | RAB21 | AIPGENE11551 | Ras-related protein Rab-21              |
| -1.61                  | 0.94                   | -0.95                  | -1.90                  | RAB23 | AIPGENE28809 | Ras-related protein Rab-23              |
| -0.17                  | -1.29                  | -0.59                  | 0.68                   | RAB23 | AIPGENE28829 | Ras-related protein Rab-23              |
| 0.14                   | 0.19                   | -0.47                  | -0.68                  | RAB24 | AIPGENE24242 | Ras-related protein Rab-24              |
| -0.63                  | -0.07                  | -1.36                  | -1.31                  | RAB24 | AIPGENE24297 | Ras-related protein Rab-24              |
| -0.45                  | 0.45                   | -1.22                  | -1.68                  | RAB24 | AIPGENE24304 | Ras-related protein Rab-24              |
| -0.55                  | 0.18                   | -0.80                  | -1.00                  | RAB24 | AIPGENE9333  | Ras-related protein Rab-24              |
| 0.64                   | 0.50                   | 0.21                   | -0.31                  | RAB26 | AIPGENE17105 | Ras-related protein Rab-26              |
| -1.09                  | -0.40                  | -2.10                  | -1.71                  | RAB26 | AIPGENE28373 | Ras-related protein Rab-26              |
| -0.14                  | -0.30                  | -0.03                  | 0.26                   | RAB28 | AIPGENE23890 | Ras-related protein Rab-28              |
| 0.01                   | 0.26                   | -0.08                  | -0.36                  | RAB3  | AIPGENE25566 | Ras-related protein Rab-3               |
| 0.04                   | -0.49                  | -0.22                  | 0.26                   | RAB30 | AIPGENE201   | Ras-related protein Rab-30              |
| -0.13                  | -0.16                  | -0.53                  | -0.38                  | RAB30 | AIPGENE26838 | Ras-related protein Rab-30              |
| -1.08                  | -0.33                  | -1.54                  | -1.23                  | RAB32 | AIPGENE20314 | Ras-related protein Rab-32              |
| 0.20                   | 0.07                   | -0.36                  | -0.44                  | RAB33 | AIPGENE207   | Putative Ras-related protein Rab-33     |
| -0.04                  | 0.19                   | -0.55                  | -0.76                  | RAB35 | AIPGENE16958 | Ras-related protein Rab-35              |
| -0.09                  | -0.04                  | -0.63                  | -0.60                  | RAB36 | AIPGENE27079 | Ras-related protein Rab-36              |
| 0.09                   | -0.12                  | -0.40                  | -0.30                  | RAB3A | AIPGENE7581  | Ras-related protein Rab-3A              |
| -0.91                  | -0.83                  | -0.61                  | 0.21                   | RAB43 | AIPGENE13082 | Ras-related protein Rab-43              |
| 0.06                   | 0.26                   | 0.04                   | -0.24                  | RAB4B | AIPGENE12050 | Ras-related protein Rab-4B              |
| -0.24                  | 0.14                   | -0.69                  | -0.85                  | RAB5B | AIPGENE10564 | Ras-related protein Rab-5B              |
| 0.08                   | 0.34                   | -0.37                  | -0.72                  | RAB6  | AIPGENE13835 | Ras-related protein Rab6                |
| -0.36                  | -0.20                  | -0.41                  | -0.22                  | RAB7A | AIPGENE5165  | Ras-related protein Rab-7a              |
| -0.92                  | -0.42                  | -1.25                  | -0.84                  | RAB7L | AIPGENE10740 | Ras-related protein Rab-7L1             |
| -0.17                  | -0.14                  | -0.59                  | -0.46                  | RAB7L | AIPGENE12601 | Ras-related protein Rab-7L1             |
| 2.79                   | -1.36                  | 1.46                   | 2.81                   | RAB8A | AIPGENE13722 | Ras-related protein Rab-8A              |
| 0.00                   | 0.12                   | -0.21                  | -0.34                  | RAB9A | AIPGENE27699 | Ras-related protein Rab-9A              |
| 0.01                   | 0.10                   | 0.48                   | 0.36                   | RABE1 | AIPGENE9062  | Rab GTPase-binding effector protein 1   |
| -0.30                  | 0.08                   | -0.72                  | -0.81                  | RABEK | AIPGENE24303 | Rab9 effector protein with kelch motifs |
| 0.30                   | 0.16                   | 0.80                   | 0.62                   | RABL6 | AIPGENE25499 | Rab-like protein 6                      |
| 0.02                   | -0.30                  | 0.19                   | 0.47                   | RABX5 | AIPGENE25911 | Rab5 GDP/GTP exchange factor            |
