# Supplementary material
Source: publisher figshare collection journal article supplement (https://gsajournals.figshare.com/articles/dataset/_/7936622)
Supplement: Supplementary file 5 [file 1]

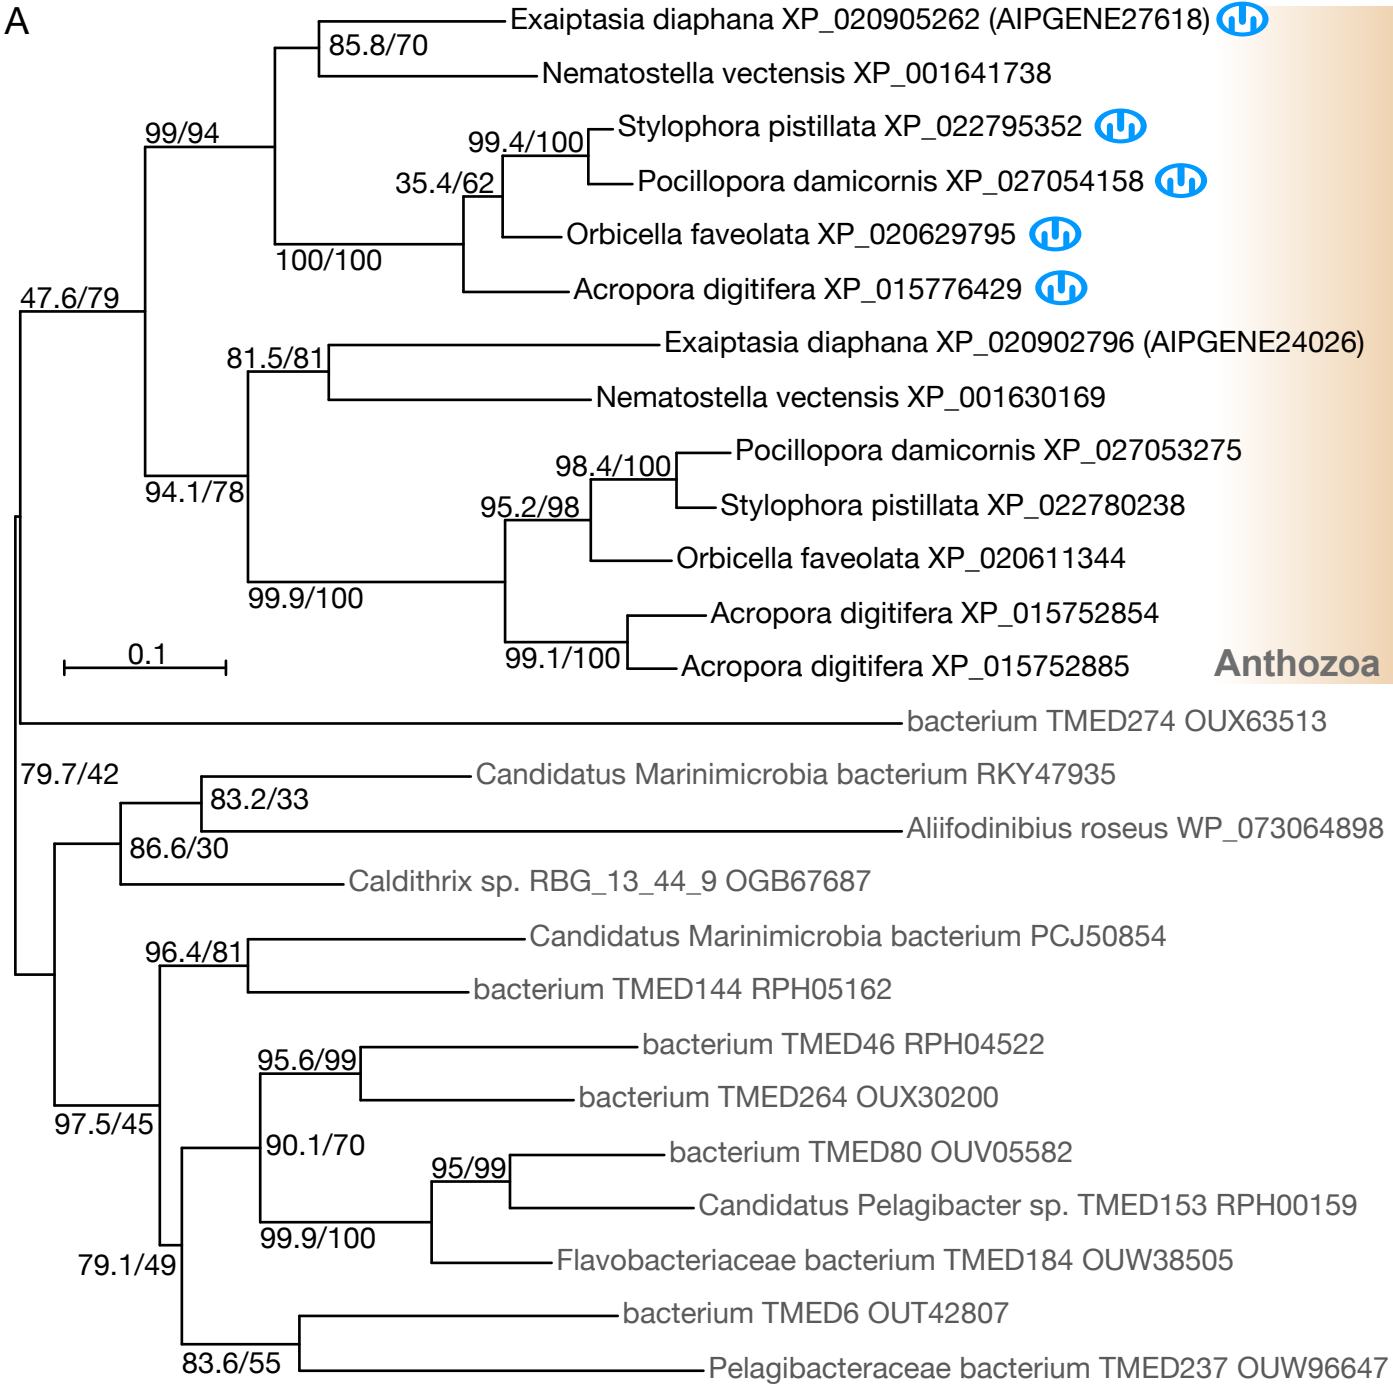

**B**

Predicted mitochondrial targeting peptide

|                             |                         |           |                     |              |            |            |
|-----------------------------|-------------------------|-----------|---------------------|--------------|------------|------------|
| XP_020905262 (AIPGENE27618) | -----MLR--VXGRG-TFSLGR- | VAIRC--LS | -----TTT--LNAAPSGT  | STKISEPKYK   | SIDDFMGYVE | KKNPGEVELH |
| XP_022795352 Stylophora     | MFLRSVARRFCIQRGSSLLGR-  | VAVRC--AS | -----GVY--RTAMMENG  | EMSDGNMRFK   | GVDDFMNHVV | KKNPGEHEFH |
| XP_027054158 Pocillopora    | MFLRSVARGFSAQRGLSLLGR-  | VAVRC--AS | -----GIYPNPTASVENG  | EMSDGNMRFK   | CVDDFMNHVV | KKNPGEHEFH |
| XP_020629795 Orbicella      | MFLRTIGSRFSIQRG-SR----  | LLRRV--PV | -RCITGVQ-QSAIENG    | TLVEGNMFKF   | SLDDFMNHVV | TKNPGEHEFH |
| XP_015776429 Acropora       | M---SFV-----            | KV-I-RIVT | -QEVSRKNKMWMLNGLSSR | SGPSNQMRKY   | SIDDFMNHVE | QKNPGEHEFH |
| XP_001641738 Nematostella   | -----                   | -----     | -----M              | WNQHLEGQYK   | SPEDFLETVR | RKNPGEAEFL |
| XP_020902796 (AIPGENE24026) | -----                   | -----     | -----               | ---MDCCGCK   | SPDDFLQLVK | RNNPGEDEFH |
| XP_022780238 Stylophora     | -----                   | -----     | -----               | ---MAGKYA    | SPEEFLEYVK | TRSPGEDEFH |
| XP_027053275 Pocillopora    | -----                   | -----     | -----               | ---MEGKYA    | SPEEFLEYVK | MRSPGEDEFH |
| XP_020611344 Orbicella      | -----                   | -----     | -----               | ---MSSKYS    | SPEEFLEYVK | RKNPGEHEFH |
| XP_015752854 Acropora       | -----                   | -----     | -----               | ---MSETESKYK | SPEAFVNYVV | RKNPGEKEFH |
| XP_001630169 Nematostella   | -----                   | -----     | -----               | ---MGCRCFN   | SPEEFLEKFK | AKDPGESEFH |

N-terminal extension      Mature protein
