# Supplementary material
Source: publisher figshare collection journal article supplement (https://gsajournals.figshare.com/articles/dataset/_/7936622)
Supplement: Supplementary file 9 [file 1]

logFC

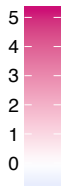

| Sym-Heat /<br>Sym-Norm | Apo-Heat /<br>Apo-Norm |       |              |                                                         |
|------------------------|------------------------|-------|--------------|---------------------------------------------------------|
| 0.50                   | 1.05                   | AHSA1 | AIPGENE9489  | Activator of 90 kDa heat shock protein ATPase homolog 1 |
| 0.69                   | 1.17                   | CH10  | AIPGENE15266 | 10 kDa heat shock protein, mitochondrial                |
| 0.04                   | -0.25                  | CH60  | AIPGENE15267 | 60 kDa heat shock protein, mitochondrial                |
| -0.03                  | 0.38                   | CHSP1 | AIPGENE12745 | Calcium-regulated heat stable protein 1                 |
| 1.91                   | 2.20                   | H90A1 | AIPGENE3199  | Heat shock protein HSP 90-alpha 1                       |
| 0.70                   | 0.42                   | HAP28 | AIPGENE12829 | 28 kDa heat- and acid-stable phosphoprotein             |
| -0.49                  | 0.14                   | HS12A | AIPGENE6574  | Heat shock 70 kDa protein 12A                           |
| -0.71                  | -0.30                  | HS12B | AIPGENE13832 | Heat shock 70 kDa protein 12B                           |
| 2.96                   | 1.18                   | HS71A | AIPGENE18790 | Heat shock 70 kDa protein 1A                            |
| 0.35                   | 0.48                   | HSF   | AIPGENE14111 | Heat shock factor protein                               |
| -0.40                  | -0.45                  | HSF1  | AIPGENE11173 | Heat shock factor protein 1                             |
| -0.01                  | -0.57                  | HSF2B | AIPGENE13751 | Heat shock factor 2-binding protein                     |
| 0.94                   | 1.76                   | HSF4  | AIPGENE8965  | Heat shock factor protein 4                             |
| -0.06                  | 0.14                   | HSP13 | AIPGENE22153 | Heat shock 70 kDa protein 13                            |
| 1.61                   | 0.76                   | HSP70 | AIPGENE8387  | Heat shock 70 kDa protein                               |
| 5.21                   | 1.13                   | HSP7C | AIPGENE21738 | Heat shock cognate 71 kDa protein                       |
| 0.91                   | 0.52                   | HSP7C | AIPGENE5814  | Heat shock cognate 71 kDa protein                       |
| 0.31                   | 0.95                   | HSP7E | AIPGENE21444 | Heat shock 70 kDa protein 14                            |
| 1.02                   | 0.67                   | HSP97 | AIPGENE27608 | 97 kDa heat shock protein                               |
| 0.23                   | 0.69                   | TRAP1 | AIPGENE15468 | Heat shock protein 75 kDa, mitochondrial                |
