# Supplementary material
Source: publisher figshare collection journal article supplement (https://gsajournals.figshare.com/articles/dataset/_/7936622)

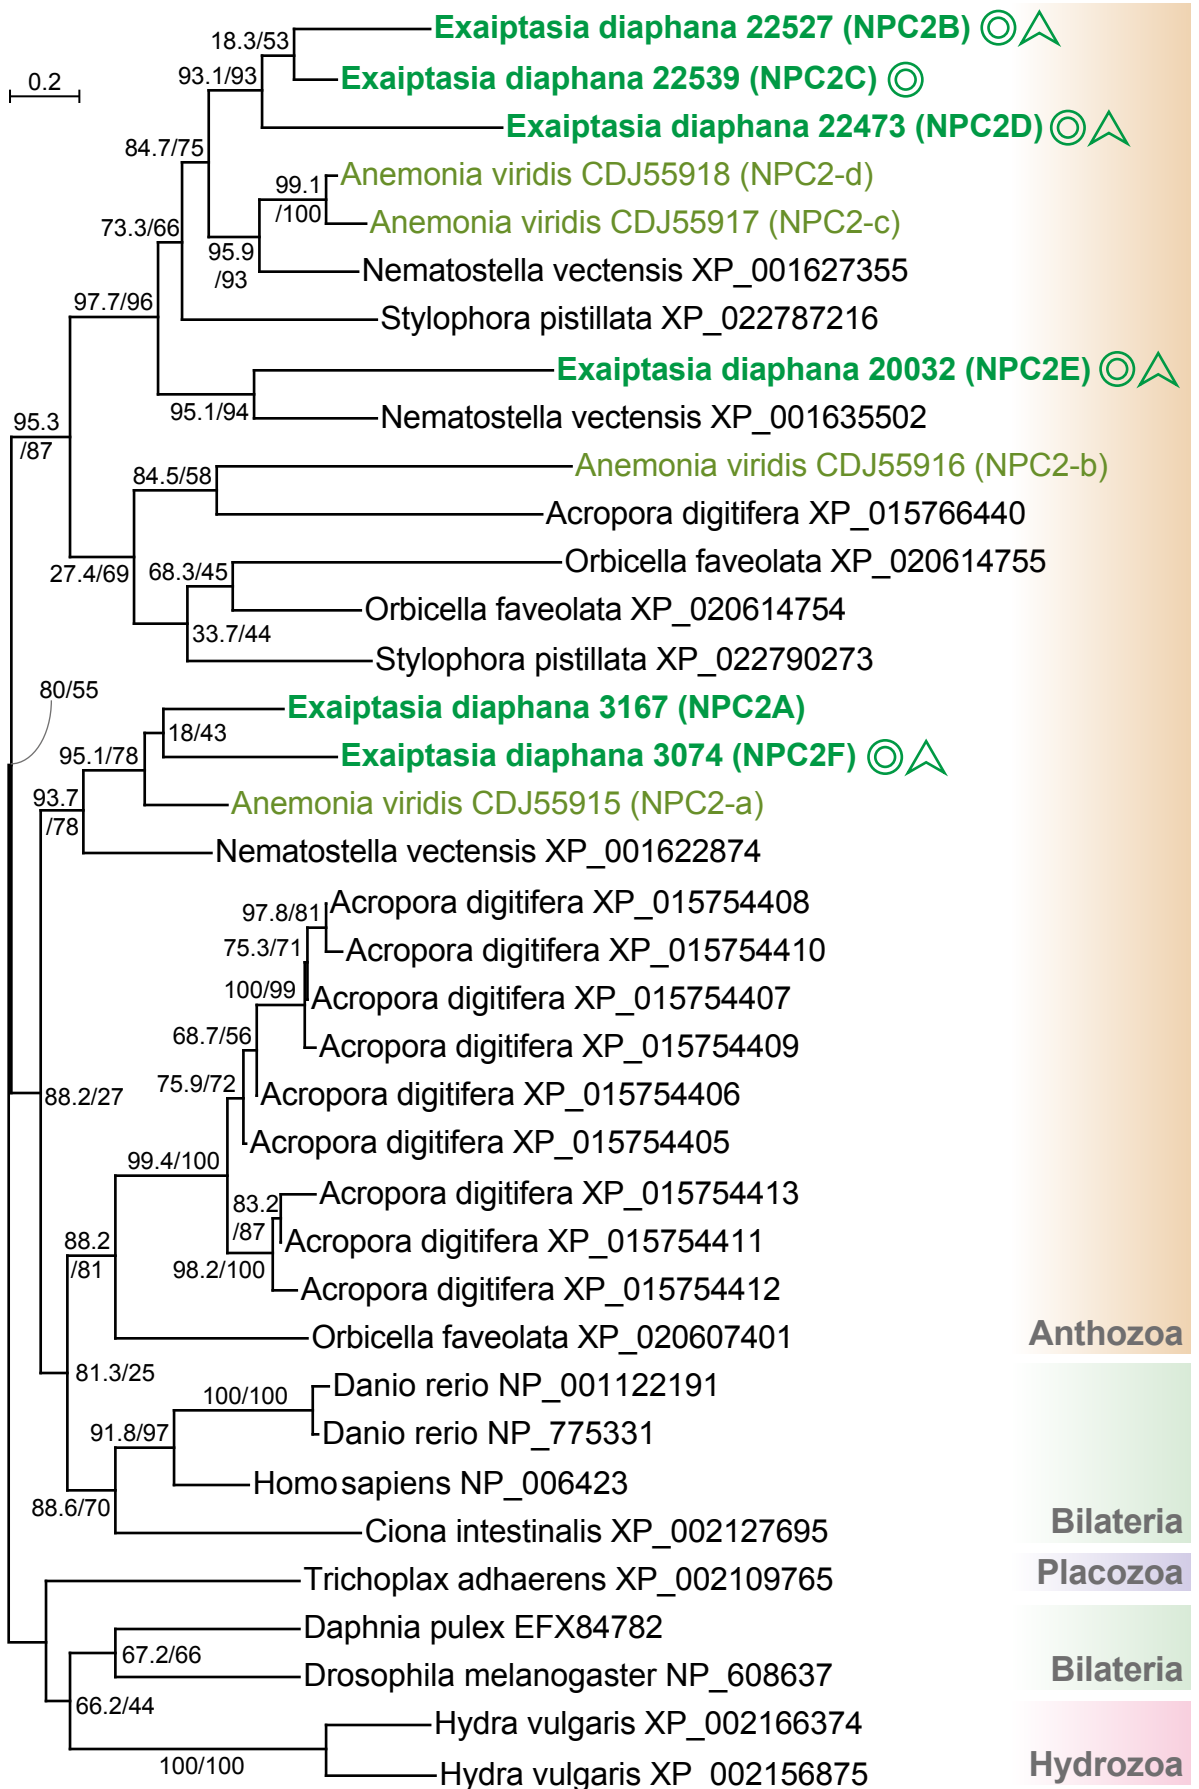

Supplement: Supplementary file 2 [file 1]

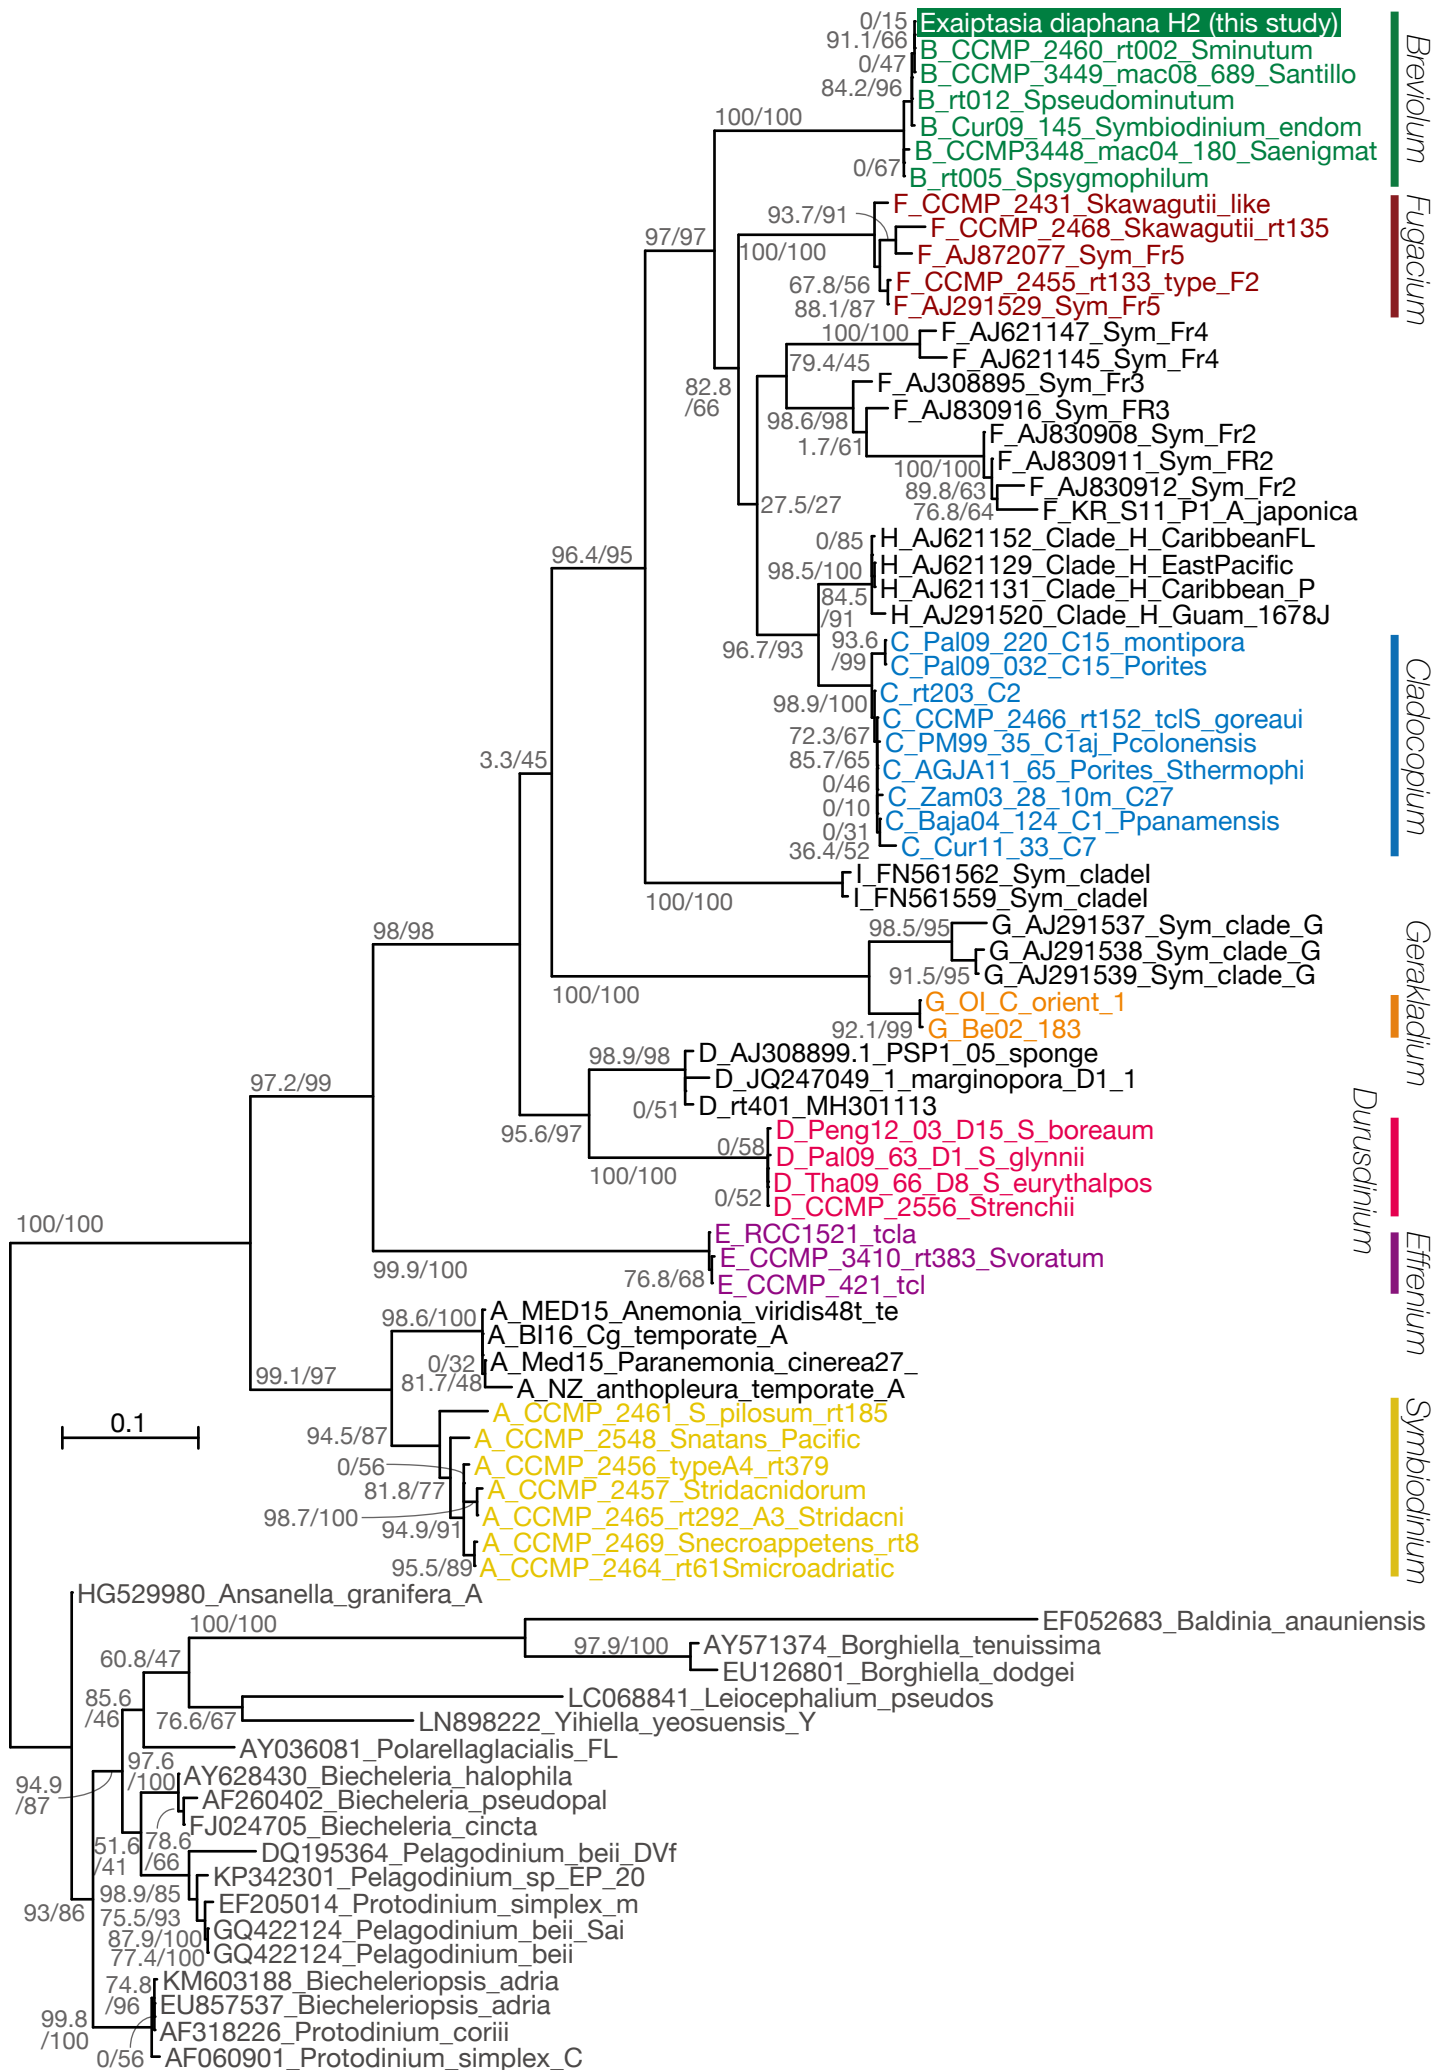

Supplement: Supplementary file 4 [file 1]

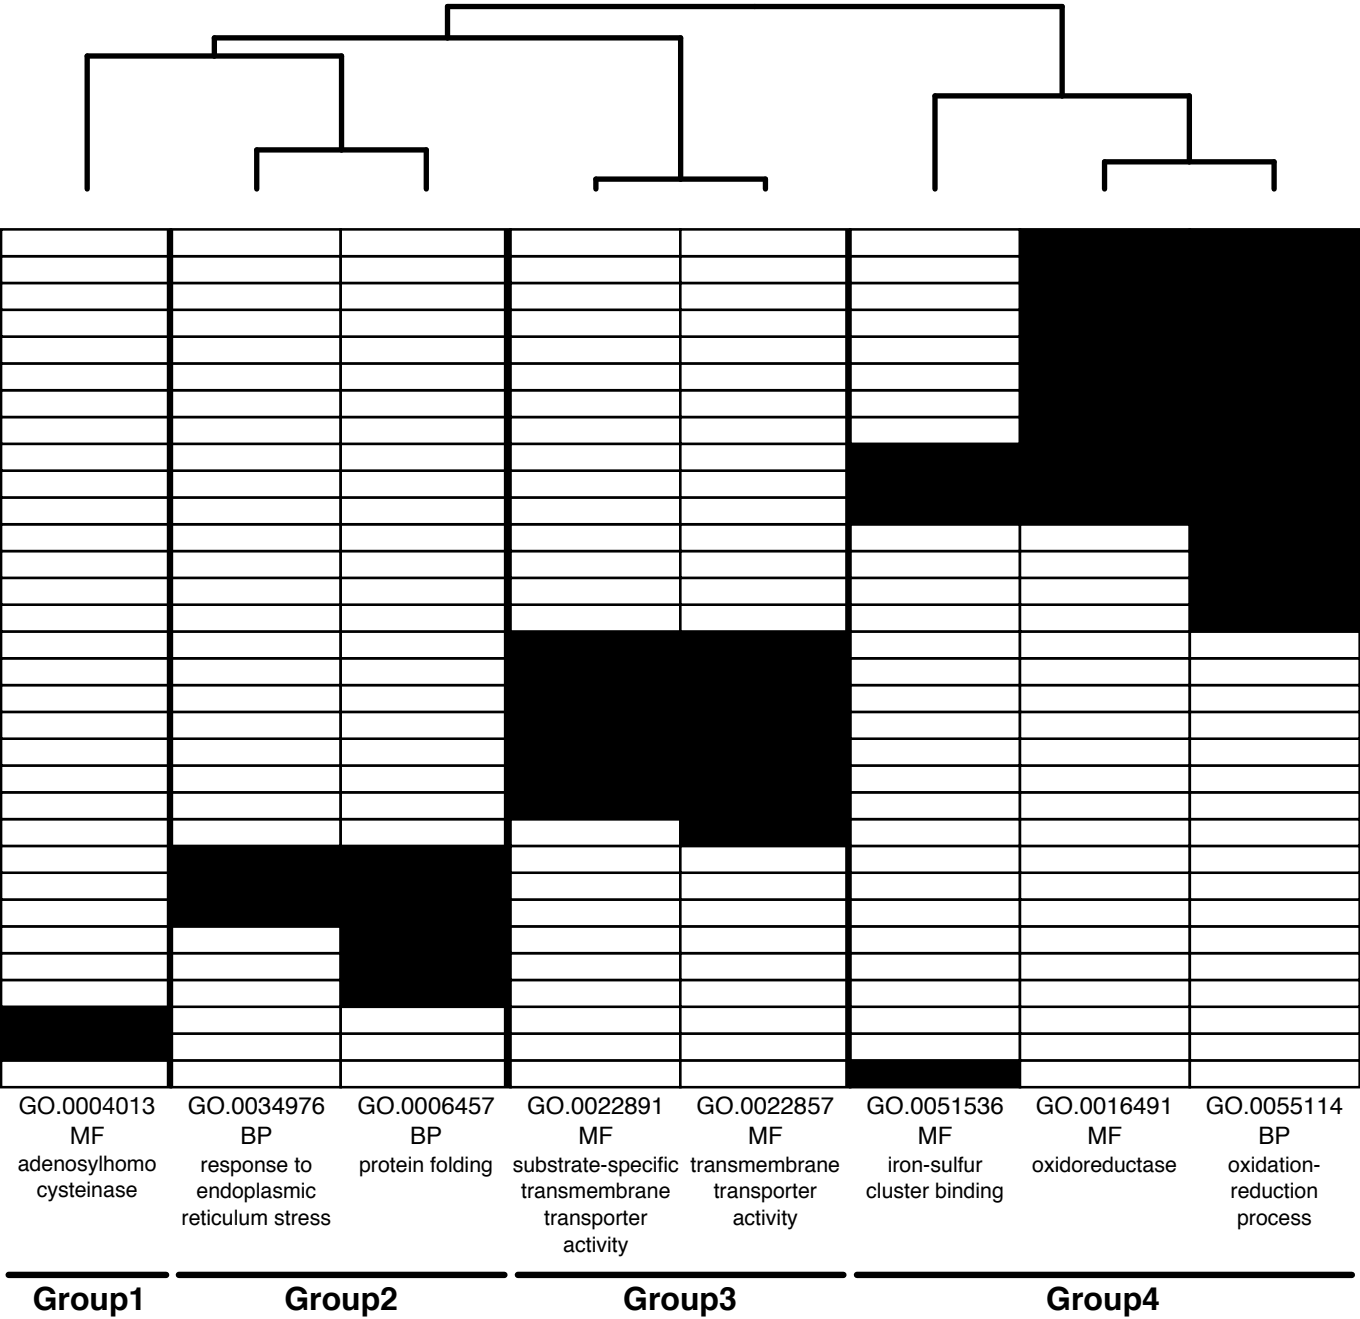

| Sym-Heat / Sym-Norm | Apo-Heat / Apo-Norm |
|---------------------|---------------------|
| -1.20               | -1.35               |
| 1.73                | 2.04                |
| -1.83               | -1.71               |
| -2.50               | -1.80               |
| -1.17               | -1.03               |
| 1.40                | 2.31                |
| 1.00                | 1.33                |
| -1.84               | -1.00               |
| -1.05               | -1.12               |
| -0.87               | -1.29               |
| -1.39               | -1.72               |
| -0.81               | -1.04               |
| -2.61               | -1.14               |
| -1.20               | -1.34               |
| -1.67               | -1.81               |
| -1.55               | -0.89               |
| -2.04               | -2.32               |
| -1.10               | -1.31               |
| -1.56               | -1.57               |
| -1.57               | -1.65               |
| -1.21               | -1.36               |
| -0.80               | -0.88               |
| -2.38               | -2.33               |
| 1.02                | 1.40                |
| 1.21                | 1.25                |
| 1.55                | 2.14                |
| 1.01                | 1.37                |
| 1.91                | 2.20                |
| 1.59                | 1.06                |
| -0.97               | -1.08               |
| -1.00               | -1.01               |
| -1.47               | -1.74               |

Supplement: Supplementary file 6 [file 1]

**A**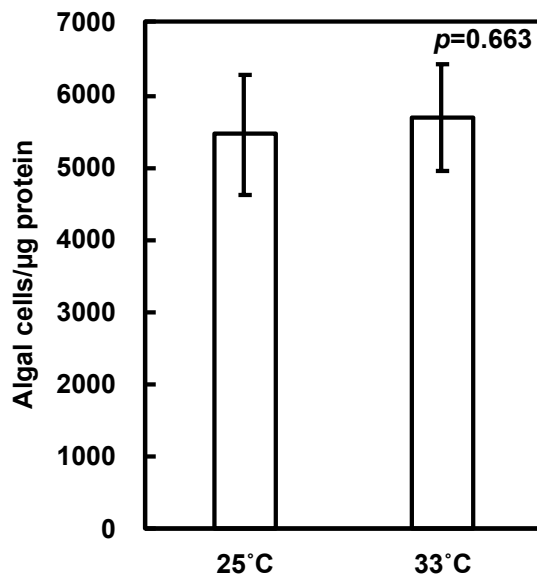**B**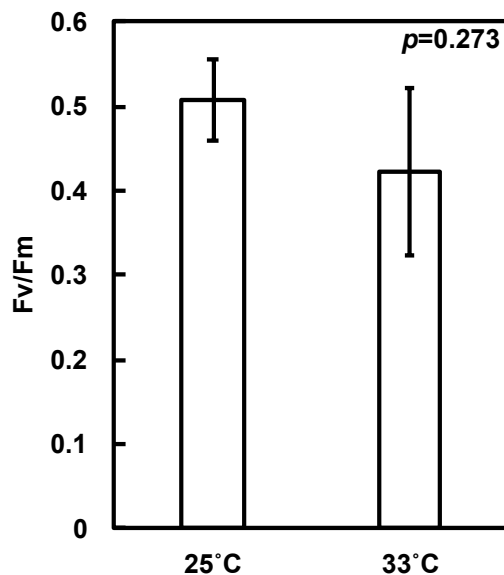**C**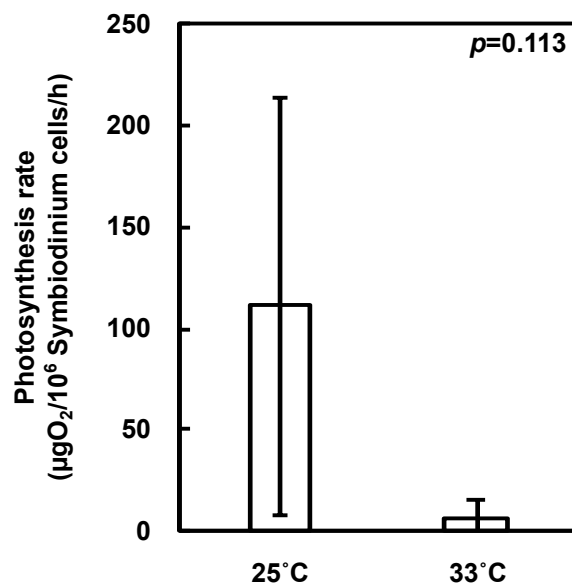**D**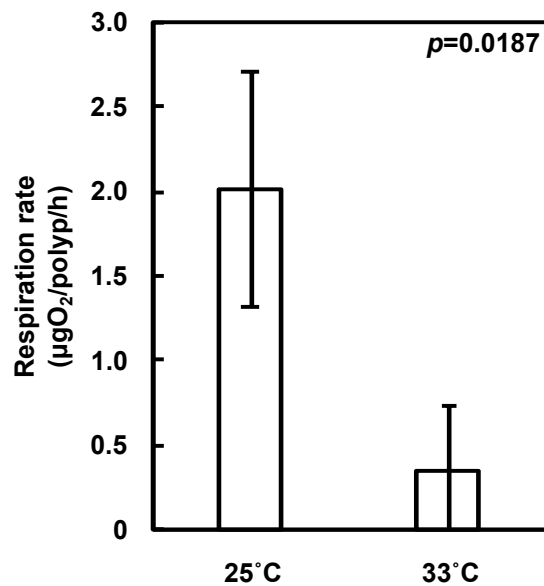

Supplement: Supplementary file 7 [file 1]

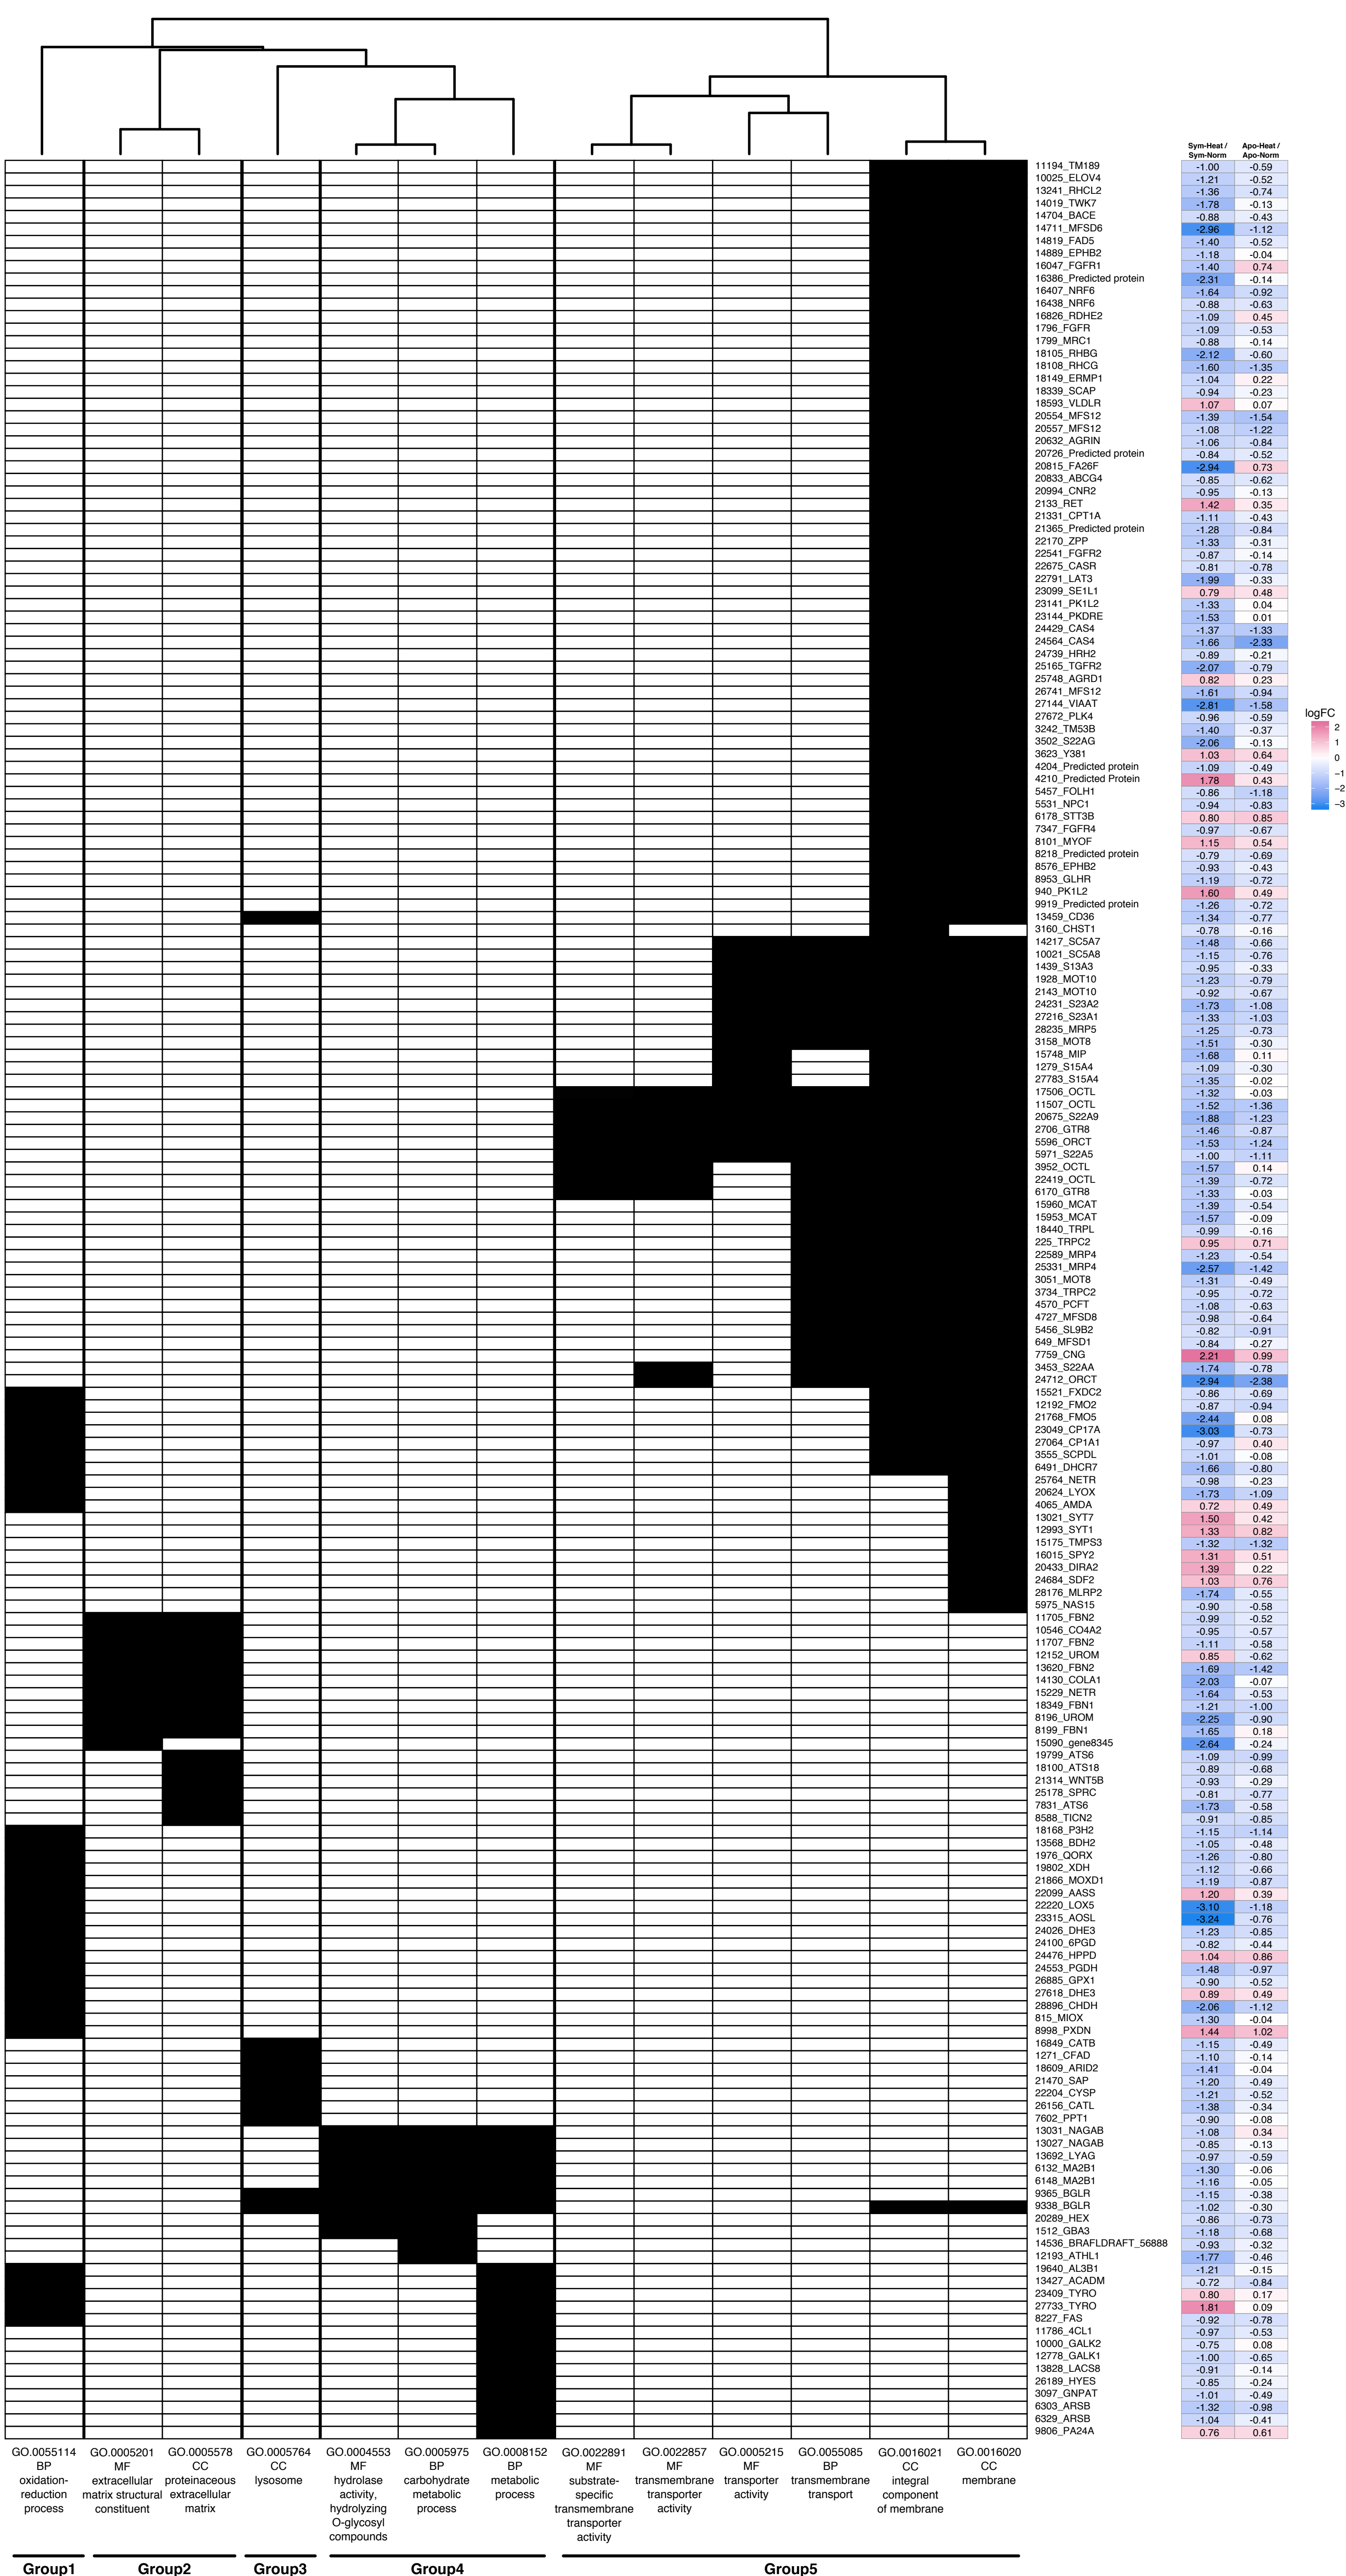

Supplement: Supplementary file 8 [file 1]
